# Supplementary material for: A Novel Infection Protocol in Zebrafish Embryo to Assess Pseudomonas aeruginosa Virulence and Validate Efficacy of a Quorum Sensing Inhibitor In Vivo
Source: PubMed Central journal article supplement (PMC8065929; doi:10.3390/pathogens10040401), 2021-03-29
Supplement: pathogens-10-00401-s001.pdf [file pathogens-10-00401-s001.pdf]

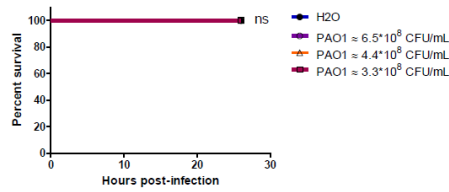

Fig. S1: Immersion of healthy embryos with *P. aeruginosa*. Survival curves (Kaplan-Meier representation) of healthy embryos (AB line, n=20 larvae per condition) immersed at 48 hpf with PAO1 wild-type strain grown in stationary phase or “fish-water” (negative control). No difference was found (p-value > 0,05).

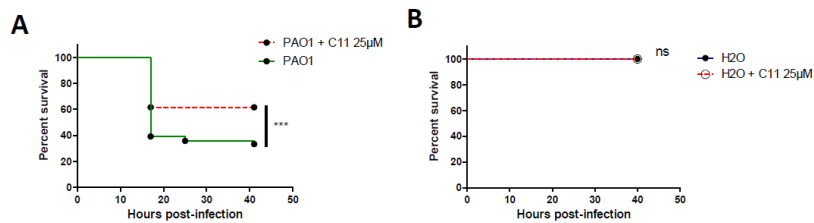

**Fig. S2. Efficiency and toxicity of C11 molecule dissolved in water.** (A) The antivirulence efficacy of C11 was tested with embryos injured in the tail fin and bath infected with PAO1 suspension at approximately  $7 \times 10^7$  CFU/mL in presence of C11 dissolved in H<sub>2</sub>O at 25 µM. A significant difference (\*\*\*)  $P < 0.001$  is found in the survival curve of C11 treated embryos comparatively to non treated embryos. (B) The toxicity of C11 at 25 µM (dissolved in H<sub>2</sub>O) was monitored after immersion of embryos injured in the tail fin. For all experiments, the embryo survival was monitored for 45 hours and survival curves were represented with a Kaplan-Meier representation. Graphs represent the pool of three independent experiments (n = 60 larvae in total per condition).
